# Supplementary material
Source: Springer Nature journal article supplement (https://www.springermedizin.de/resource/supplementary/12905_2008_167_MOESM4_ESM.pdf/9519224)

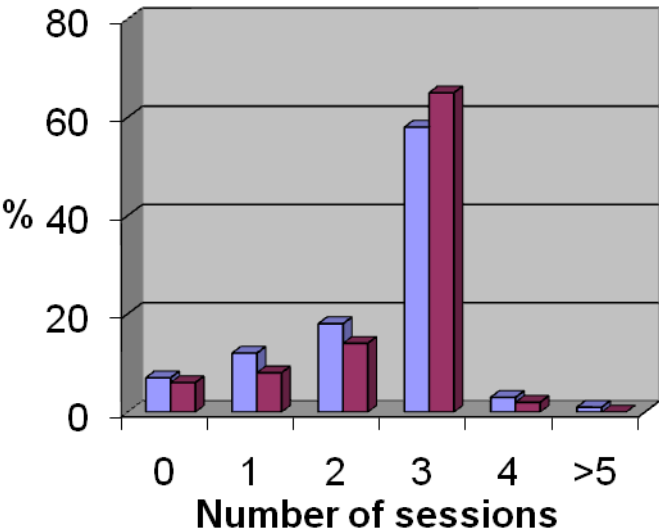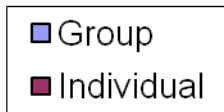

Supplement: MOESM4 [file 9519224]
